# Supplementary material for: Transforming Water: Social Influence Moderates Psychological, Physiological, and Functional Response to a Placebo Product
Source: PLoS One. 2016 Nov 22;11(11):e0167121. doi: 10.1371/journal.pone.0167121 (PMC5119827; doi:10.1371/journal.pone.0167121)
Supplement: S2 Table — (PDF) [file pone.0167121.s004.pdf]

**S2 Table. Longitudinal regression model for changes in systolic blood pressure from min14 to min24, with time mean-centered at min19.**

|                                            |    | 90% Winsorized Method |      |           |      | 3 SD Outlier Method |      |          |      |
|--------------------------------------------|----|-----------------------|------|-----------|------|---------------------|------|----------|------|
|                                            |    | Orthogonal            |      | Dummy     |      | Orthogonal          |      | Dummy    |      |
|                                            |    | <i>B</i>              | SE   | <i>B</i>  | SE   | <i>B</i>            | SE   | <i>B</i> | SE   |
| <b>Fixed Effects</b>                       |    |                       |      |           |      |                     |      |          |      |
| Level-1 Intercept ( $\pi_{0i}$ )           |    |                       |      |           |      |                     |      |          |      |
| Intercept                                  | 00 | 118.77***             | 0.79 | 117.62*** | 1.39 | 118.02***           | 0.82 | 116.8*** | 1.44 |
| Condition: Confederate vs No Confederate   | 01 | 1.15                  | 1.13 |           |      | 1.21                | 1.17 |          |      |
| Condition: Disconfirming vs Confirming     | 02 | 2.86                  | 1.95 |           |      | 3.83~               | 2.02 |          |      |
| Condition: Confirming vs No Confederate    | 01 |                       |      | 0.29      | 1.96 |                     |      | -0.09    | 2.04 |
| Condition: Disconfirming vs No             |    |                       |      |           |      |                     |      |          |      |
| Confederate                                | 02 |                       |      | 3.15      | 1.95 |                     |      | 3.73~    | 2.01 |
| Average Baseline Systolic Blood Pressure   | 03 | 1.06***               | 0.06 | 1.06***   | 0.06 | 1.06***             | 0.06 | 1.06***  | 0.06 |
| Slope from Minute 19-24 ( $\pi_{1i}$ )     |    |                       |      |           |      |                     |      |          |      |
| Intercept                                  | 10 | -0.42*                | 0.2  | 0.03      | 0.36 | -0.51*              | 0.23 | -0.06    | 0.40 |
| Condition: Confederate vs No Confederate   | 11 | -0.45                 | 0.29 |           |      | -0.45               | 0.32 |          |      |
| Condition: Disconfirming vs Confirming     | 12 | -0.9~                 | 0.5  |           |      | -0.97~              | 0.55 |          |      |
| Condition: Confirming vs No Confederate    | 11 |                       |      | -0.22     | 0.5  |                     |      | -0.19    | 0.56 |
| Condition: Disconfirming vs No             |    |                       |      |           |      |                     |      |          |      |
| Confederate                                | 12 |                       |      | -1.12*    | 0.5  |                     |      | -1.16*   | 0.55 |
| Average Baseline Systolic Blood Pressure   | 13 | 0                     | 0.02 | 0         | 0.02 | 0                   | 0.02 | 0        | 0.02 |
| Shift in Slope at Minute 14 ( $\pi_{2i}$ ) |    |                       |      |           |      |                     |      |          |      |
| Intercept                                  | 20 | 0.58*                 | 0.28 | 0.1       | 0.49 | 0.52~               | 0.31 | 0.05     | 0.54 |
| Condition: Confederate vs No Confederate   | 21 | 0.47                  | 0.4  |           |      | 0.47                | 0.44 |          |      |
| Condition: Disconfirming vs Confirming     | 22 | 1.93**                | 0.69 |           |      | 2.14**              | 0.75 |          |      |
| Condition: Confirming vs No Confederate    | 21 |                       |      | -0.26     | 0.7  |                     |      | -0.37    | 0.76 |
| Condition: Disconfirming vs No             |    |                       |      |           |      |                     |      |          |      |
| Confederate                                | 22 |                       |      | 1.67*     | 0.69 |                     |      | 1.77*    | 0.75 |
| Average Baseline Systolic Blood Pressure   | 23 | 0.02                  | 0.02 | 0.02      | 0.02 | 0.01                | 0.02 | 0.01     | 0.02 |
| <b>Variance Components</b>                 |    |                       |      |           |      |                     |      |          |      |

|                        |                        |          |          |          |          |
|------------------------|------------------------|----------|----------|----------|----------|
| Level-1                |                        |          |          |          |          |
| within-person          | $\sigma_\varepsilon^2$ | 53.3***  | 53.3***  | 61.85*** | 61.85*** |
| Level-2                |                        |          |          |          |          |
| In level-1 intercept   | $\sigma_0^2$           | 40.91*** | 40.91*** | 41.24*** | 41.24*** |
| In slope (min 19-24)   | $\sigma_1^2$           | 1.57***  | 1.57***  | 1.99***  | 1.99***  |
| Covariance             | $\sigma_{01}$          | 2.88**   | 2.88**   | 2.88**   | 2.88**   |
| <b>Goodness-of-fit</b> |                        |          |          |          |          |
| Deviance               |                        | 7462.214 | 7462.214 | 7462.292 | 7462.292 |
| AIC                    |                        | 7494.214 | 7494.214 | 7494.292 | 7494.292 |
| BIC                    |                        | 7535.076 | 7535.076 | 7534.985 | 7534.985 |

Note.  $\sim p \leq 0.10$ ,  $*p \leq 0.05$ ,  $**p \leq 0.01$ ,  $***p \leq 0.001$ . The table presents the regression coefficients, standard errors, and goodness-of-fit statistics for the same longitudinal model displayed in S1 Table, except time is mean-centered at minute 19 rather than minute 14, to better illuminate the slopes in the post shared reality period after the confederate speaks in the social influence conditions. This set of models has equivalent goodness-of-fit statistics as the models in S1 Table but the parameters have different interpretations.  $\pi_{0i}$  is now the level of SBP at minute 19.  $\pi_{1i}$  is the slope of SBP from minute 19 to minute 24, and  $\pi_{2i}$  is a time-varying predictor that represents the shift in slope during minute 14-19 relative to the slope during minute 19-24. Each Level-1 parameter was allowed to differ as a function of condition, controlling for (grand mean centered) SBP during the baseline period, from minute 1 to 13. As before, we fit models in which condition was coded either with dummy codes or with orthogonal contrast codes (each yielded equivalent goodness of fit statistics) and using both methods for addressing outliers, a 90% winsorization within each minute (left panel) or dropping observations that lay beyond 3 SD of the mean in either direction for each minute (right panel). Each model contained four random effects, as shown. We report results from the left panel in the main text.  $N=95$ . Deviance =  $-2 * \log \text{likelihood}$ . AIC = Akaike Information Criterion. BIC = Bayesian Information Criterion.
